# Supplementary material for: Xist and Tsix Transcription Dynamics Is Regulated by the X-to-Autosome Ratio and Semistable Transcriptional States
Source: PubMed Central journal article supplement (PMC5064214; doi:10.1128/mcb.00183-16), 2016-10-13

# Supplementary Figure 6

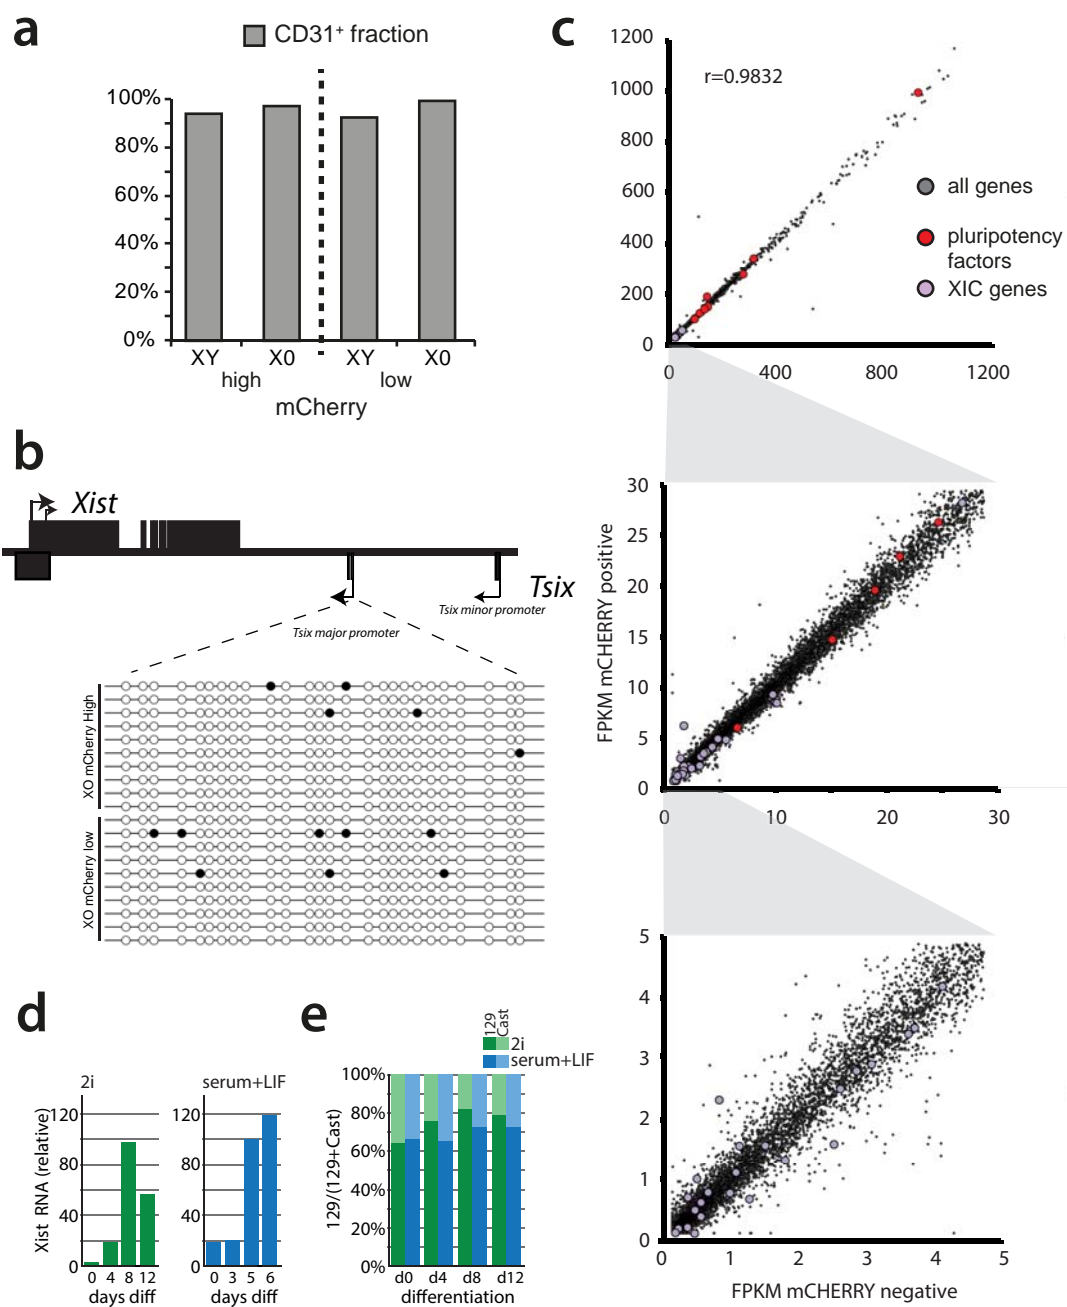

Supplement: MCB.00183-16_zmb999101334so6.pdf [file MCB.00183-16_zmb999101334so6.pdf]
