# Supplementary material for: Xist and Tsix Transcription Dynamics Is Regulated by the X-to-Autosome Ratio and Semistable Transcriptional States
Source: PubMed Central journal article supplement (PMC5064214; doi:10.1128/mcb.00183-16), 2016-10-13
Supplement: MCB.00183-16_zmb999101334so8.pdf [file MCB.00183-16_zmb999101334so8.pdf]

| #    | SEQUENCE                     | DESCRIPTION                                                                                   |
|------|------------------------------|-----------------------------------------------------------------------------------------------|
| 1    | AGGTACCTCCAAGGTATGGAGTCACC   | Forward primer 5' targeting arm for <i>Xist</i>                                               |
| 2    | TACCGGTAGGAGAGAAACCACGGAAGAA | Reverse primer 5' targeting arm for <i>Xist</i>                                               |
| 5    | TAGTACTCAATGGCTTGACCCAGACTT  | Forward primer 3' targeting arm for <i>Xist</i>                                               |
| 6    | TAGTACTGTGCCAGAAGAGGGGAGTCAG | Reverse primer 3' targeting arm for <i>Xist</i> ;<br>Reverse primer ScrFI RFLP in <i>Xist</i> |
| 20   | GCTGGTTCGTCTATCTTGTGG        | Forward primer ScrFI RFLP in <i>Xist</i>                                                      |
| 25   | CTTTGGTCTCTGGGTTTCCA         | Forward primer 5' targeting arm for <i>Tsix</i>                                               |
| 27   | TACCGGTAGCTGGCTATCACGCTCTTC  | Reverse primer 5' targeting arm for <i>Tsix</i>                                               |
| 29   | GAGGGCAGATGCCTAAAGTG         | Forward primer 3' targeting arm for <i>Tsix</i>                                               |
| 30   | CGCAGGCATTTTACCTTCAT         | Reverse primer 3' targeting arm for <i>Tsix</i>                                               |
| 36   | AGTGCAGCGCTTGTGTCA           | Forward primer <i>Tsix</i> length polymorphism, for DNA                                       |
| 41   | TATTACCCACGCCAGGCTTA         | Reverse primer <i>Tsix</i> length polymorphism, for DNA                                       |
| 68   | TCCCAATTA AAGGTGTTGA         | Forward primer Pf1MI RFLP in <i>Atrx</i>                                                      |
| 69   | AATTCACGTTCTCCTCTTTCCT       | Reverse primer Pf1MI RFLP in <i>Atrx</i>                                                      |
| 106  | AGGGCATCGACTTCAAGGAG         | Forward primer EGFP expression                                                                |
| 107  | CACCTTGATGCCGTTCTTCTG        | Reverse primer EGFP expression                                                                |
| 108  | CCGTAATGCAGAAGAAGACC         | Forward primer mCherry expression                                                             |
| 109  | CTTCAGCCTCTGCTTGATCTC        | Reverse primer mCherry expression                                                             |
| 137  | GTGATGGAAGAAGAGCGTGA         | Forward primer <i>Tsix</i> expression                                                         |
| 138  | GCTGCTTGCAATCACTTTA          | Reverse primer <i>Tsix</i> expression                                                         |
| 157  | AACCCTAAGGCCAACCGTGAAAAG     | Forward primer <i>Actb</i> expression                                                         |
| 158  | CATGGCTGGGGTGTGAAGGTCTC      | Reverse primer <i>Actb</i> expression                                                         |
| 159  | GGATCCTGCTTGAACACTGC         | Forward primer <i>Xist</i> expression                                                         |
| 160  | CAGGCAATCCTT CTTCTTGAG       | Reverse primer <i>Xist</i> expression                                                         |
| 1445 | ACTGGGTCTTCAGCGTGA           | Forward primer <i>Xist</i> length polymorphism exon 6-7, for RNA                              |
| 1446 | GCAACAACGAATTAGACAACAC       | Reverse primer <i>Xist</i> length polymorphism exon 6-7, for RNA                              |
